# Supplementary material for: A Neuron-Optimized CRISPR/dCas9 Activation System for Robust and Specific Gene Regulation
Source: eNeuro. 2019 Mar 7;6(1):ENEURO.0495-18.2019. doi: 10.1523/ENEURO.0495-18.2019 (PMC6412672; doi:10.1523/ENEURO.0495-18.2019)
Supplement: Extended Data Table 1-1 — Download Table 1-1, XLSX file. [file sup_enu-eN-MNT-0495-18-s05.xlsx]

## Sheet: Sheet1
Table 1-1. PCR primers and sgRNA targets
cDNA primers (RT-qPCR)
Gene	Species	Forward sequence	Reverse sequence
GAPDH	H. sapien	TGTCAAGCTCATTTCCTGGTAT	CTCTCTTCCTCTTGTGCTCTTG
FOS	H. sapien	CAAGCGGAGACAGACCAACT	AGTCAGATCAAGGGAAGCCA
Gapdh	R. norvegicus	ACCTTTGATGCTGGGGCTGGC	GGGCTGAGTTGGGATGGGGACT
Fos	R. norvegicus	CAGCCTTTCCTACTACCATTCC	ACAGATCTGCGCAAAAGTCC
Reln	R. norvegicus	AATCGGCAAGAGTCACCGAAGCC	CTGTCTGTGCCGTGCTCCCAA
Nr4a1	R. norvegicus	AAGTTGGGGTAGTGTGCGAG	GGATACAGGGCATCTCCGGC
Egr1	R. norvegicus	TCCTCAAGGGGAGCCGAGCG	GGTGATGGGAGGCAACCGGG
Fosb	R. norvegicus	TGCAGCTAAATGCAGAAACC	CTCTTCGAGCTGATCCGTTT
Ascl1	R. norvegicus	CCTACGACCCCCTTAGTCCA	TGCCATCCTGCTTCCAAAGT
Isl1	R. norvegicus	GGTGCAAGGACAAGAAACGC	TGCACCTCAACTGGGTTAGC
Ebf1	R. norvegicus	CCAACTCACCCTACGCCATT	GTCTGGGGTCTGACAACTGG
Bdnf I	R. norvegicus	AACAAGACACATTACCTTCCAGCAT	CTCTTCTCACCTGGTGGAACATT
Bdnf IV	R. norvegicus	GCTGCCTTGATGTTTACTTTGA	GCAACCGAAGTATGAAATAACC
Bdnf IX	R. norvegicus	GAGAAGAGTGATGACCATCCT	TCACGTGCTCAAAAGTGTCAG
CRISPR single guide RNAs (sgRNAs)
Genomic locus	Species	Target Sequence	Genomic coordinates	Targeting Strand	Distance from TSS (bp)	Source
LacZ	E. coli	TGCGAATACGCCCACGCGAT	E. coli strain 99-3165:3,886,546-3,886,565	positive	N/A	(Platt et al. 2014)
FOS 1	H. sapien	GGGAAGACCGGGGCTGTGCG	Hg38:Chr14:75,277,418-75,277,440	positive	-1360	This manuscript
FOS 2	H. sapien	GGGGTAGGGAGTGCGAGGTG	Hg38:Chr14:75,277,826-75,277,848	negative	-952	This manuscript
FOS 3	H. sapien	GTTTCCGTACAAGGGTAAAA	Hg38:Chr14:75,278,294-75,278,316	positive	-1360	This manuscript
Fos 1	R. norvegicus	ATGGAGGCTAGCGCATAGGC	Rn6:Chr6:109,298,703-109,298,722	positive	-1730	This manuscript
Fos 2	R. norvegicus	TTGTTCTACACCGAAGCACC	Rn6:Chr6:109,299,229-109,299,248	positive	-1204	This manuscript
Fos 3	R. norvegicus	GGCCACGGCTCTTGGGGAGC	Rn6:Chr6:109,298,797-109,298,816	positive	-1636	This manuscript
Reln	R. norvegicus	CGTGCCGGTGCCTCCGAAAG	Rn6:Chr4:9,347,712-9,347,731	positive	79	This manuscript
Nr4a1 1	R. norvegicus	GACTGGGAAAGCGACAAAGG	Rn6:Chr7:142,911,778-142,911,797	positive	-531	This manuscript
Nr4a1 2	R. norvegicus	GAATGACACCGTAGGTGTCC	Rn6:Chr7:142,911,752-142,911,771	positive	-557	This manuscript
Egr1	R. norvegicus	GTGGAAGCGCCCACCGCTCT	Rn6:Chr18:27,657,365-27,657,384	positive	-263	This manuscript
Fosb 1	R. norvegicus	GGCGCGGCCGACTGTTTGTT	Rn6:Chr1:80,221,985-80,222,004	positive	-294	This manuscript
Fosb 2	R. norvegicus	CGGAGGCATAAATTCAGCTC	Rn6:Chr1:80,221,720-80,221,739	negative	-29	This manuscript
Ascl1 1	R. norvegicus	ACGCACTGCAACAACAAACC	Rn6:Chr7:28,040,711-28,040,692	negative	-182	This manuscript
Ascl1 2	R. norvegicus	GATGGGAAAGGAGGGCGCTC	Rn6:Chr7:28,041,554-28,041,573	positive	-1063	This manuscript
Ascl1 3	R. norvegicus	AGAAGGGGAGGTGCCTGCAG	Rn6:Chr7:28,041,794-28,041,813	positive	-1303	This manuscript
Isl1 1	R. norvegicus	GGAGGCTTAATCCTCTCCTG	Rn6:Chr2:48,501,659-48,501,640	negative	-204	This manuscript
Isl1 2	R. norvegicus	GGTAGGTTCTTCCTGTGAAC	Rn6:Chr2:48,501,863-48,501,882	positive	-446	This manuscript
Isl1 3	R. norvegicus	TGATCAAAACCGTCTAAGGG	Rn6:Chr2:48,502,514-48,502,495	negative	-1059	This manuscript
Ebf1 1	R. norvegicus	GCTGGAGTTTCCTTTTGTAG	Rn6:Chr10:23,660,895-23,660,876	negative	-118	This manuscript
Ebf1 2	R. norvegicus	CGGCCGTAAAGAGCAAGAAA	Rn6:Chr10:23,660,208-23,660,189	negative	-805	This manuscript
Ebf1 3	R. norvegicus	GTGCGTGTAGATGAGGACGC	Rn6:Chr10:23,660,690-23,660,671	negative	-323	This manuscript
Bdnf I	R. norvegicus	AGAATACCAGAAAAGCGCAG	Rn6:Chr3:100,768,614-100,768,633	negative	-23	This manuscript
Bdnf IV	R. norvegicus	CACTAGAGTGTCTATTTCG	Rn6:Chr3:100,786,779-100,786,797	positive	-83	(Solvsten et al. 2017)
