# Supplementary material for: A Neuron-Optimized CRISPR/dCas9 Activation System for Robust and Specific Gene Regulation
Source: eNeuro. 2019 Mar 7;6(1):ENEURO.0495-18.2019. doi: 10.1523/ENEURO.0495-18.2019 (PMC6412672; doi:10.1523/ENEURO.0495-18.2019)
Supplement: Extended Data Table 4-1 — Download Table 4-1, XLSX file. [file sup_enu-eN-MNT-0495-18-s06.xlsx]

## Sheet: Bdnf I sgRNA off-target
Table 4-1: Off-target predictions Bdnf I sgRNA
crRNA sequence	DNA match	Chromosome	Position	Direction	Mismatches	Annotated Feature	Ensebmle ID	Feature Strand	Orientation	Distance	Basemean	Log2(Fold change)	padj
AGAATACCAGAAAAGCGCAGNGG	AGAAaAgCAGAAcAGaGCAGAGG	1	3840342	+	4
AGAATACCAGAAAAGCGCAGNGG	AGAATACCAGcAAAttaCAGAGG	1	19464619	+	4
AGAATACCAGAAAAGCGCAGNGG	AGAAcACCAGAAgAGgGCAtCGG	1	47256243	-	4	Sytl3	ENSRNOG00000018321	+	overlapping	0	4.59825	-0.723552	NA
AGAATACCAGAAAAGCGCAGNGG	AGAAacaCAGAAAAGgGCAGGGG	1	81213976	-	4	Lypd5	ENSRNOG00000019432	+	upstream	39	327.397	-0.117168	0.666776
AGAATACCAGAAAAGCGCAGNGG	AaAATtCaAGAAAAGCcCAGAGG	1	85393624	+	4	Plekhg2	ENSRNOG00000030266	+	overlapping	0	734.155	-0.0337186	0.907399
AGAATACCAGAAAAGCGCAGNGG	AGAAcACCAGAAgAGgGCAtCGG	1	87555395	-	4
AGAATACCAGAAAAGCGCAGNGG	AGAATACCAGAAgAGgGCAcCGG	1	97150983	+	3
AGAATACCAGAAAAGCGCAGNGG	AGAAacCatGAAAAGCGCAGTGG	1	104885253	+	4	Nav2	ENSRNOG00000014530	+	overlapping	0	2902.47	-0.148378	0.335172
AGAATACCAGAAAAGCGCAGNGG	AGAATACCAGAAAAtaGgtGAGG	1	113984598	+	4
AGAATACCAGAAAAGCGCAGNGG	AGAAaAaaAGAAAAGCaCAGTGG	1	129738740	+	4
AGAATACCAGAAAAGCGCAGNGG	taAATACCAGAAAAGgGCAaAGG	1	131623433	-	4
AGAATACCAGAAAAGCGCAGNGG	AGAAcACCAGAAgAGgGCAtCGG	1	141215650	-	4	AABR07004397.1	ENSRNOG00000030679	+	upstream	859	0.706443	1.31391	NA
AGAATACCAGAAAAGCGCAGNGG	AGAATAaaAGgAAAGtGCAGAGG	1	160740782	+	4
AGAATACCAGAAAAGCGCAGNGG	tGAcTACCAGAAAAGgGCtGTGG	1	165387320	+	4	C2cd3	ENSRNOG00000017608	+	overlapping	0	976.517	-0.177724	0.20378
AGAATACCAGAAAAGCGCAGNGG	AGAAcACCAGgAcAGCaCAGAGG	1	167857819	-	4	LOC684208	ENSRNOG00000048369	+	overlapping	0	0	NA	NA
AGAATACCAGAAAAGCGCAGNGG	AGAATAgCtGcAtAGCGCAGAGG	1	168245274	-	4	Olr79	ENSRNOG00000015764	+	overlapping	0	0	NA	NA
AGAATACCAGAAAAGCGCAGNGG	AGAATgCCAGAgAAGtGCAtAGG	1	170112265	-	4
AGAATACCAGAAAAGCGCAGNGG	AGAAcACaAGAAAAGCGCAtGGG	1	186699037	+	3
AGAATACCAGAAAAGCGCAGNGG	gaAATACCAGAAAAGgGCAtTGG	1	199763632	-	4
AGAATACCAGAAAAGCGCAGNGG	cGAATcCCAGAcAAGCtCAGAGG	1	204119029	+	4
AGAATACCAGAAAAGCGCAGNGG	AGAcTtCCAGAAAAGCtCAcAGG	1	206031127	+	4	Adam12	ENSRNOG00000018384	-	overlapping	0	222.213	-0.187974	0.618247
AGAATACCAGAAAAGCGCAGNGG	gGAATACCAGcAcAGCaCAGTGG	1	235299283	-	4	Gna14	ENSRNOG00000014840	+	overlapping	0	12.3808	0.229902	NA
AGAATACCAGAAAAGCGCAGNGG	ctAATACCAtAAAAGgGCAGGGG	1	244146601	-	4
AGAATACCAGAAAAGCGCAGNGG	AGAATACCAcAAcAGacCAGAGG	1	246592834	+	4	Glis3	ENSRNOG00000014768	-	overlapping	0	103.906	-0.0617154	0.929769
AGAATACCAGAAAAGCGCAGNGG	AGAATACaAGAAAAGCaCAGTGG	1	267947994	-	2
AGAATACCAGAAAAGCGCAGNGG	AGAATACaAGAAAAGCaCAGTGG	1	271616877	+	2
AGAATACCAGAAAAGCGCAGNGG	gGAATAaCAaAAAAGCcCAGGGG	2	481744	+	4
AGAATACCAGAAAAGCGCAGNGG	AGcATACaAGAAAgGtGCAGAGG	2	14603811	-	4
AGAATACCAGAAAAGCGCAGNGG	AGAAcACCAGAAgAGgGCAtCGG	2	29323521	+	4
AGAATACCAGAAAAGCGCAGNGG	AcAAgcCCAGAAAAGgGCAGAGG	2	30021387	+	4
AGAATACCAGAAAAGCGCAGNGG	AGAccACggGAAAAGCGCAGAGG	2	39911877	+	4
AGAATACCAGAAAAGCGCAGNGG	AGcAccCCAGAAAAGaGCAGAGG	2	65163501	-	4
AGAATACCAGAAAAGCGCAGNGG	AGAAgACCAGAAgAGaGCAcTGG	2	75232566	+	4
AGAATACCAGAAAAGCGCAGNGG	tGgATACCAGgAAAGtGCAGAGG	2	124402222	+	4	Spry1	ENSRNOG00000025371	+	overlapping	0	702.102	-0.0141792	0.963053
AGAATACCAGAAAAGCGCAGNGG	AGAATACaAGAgAAtCtCAGAGG	2	133789879	+	4
AGAATACCAGAAAAGCGCAGNGG	AGgATgCCAGAAAAGtGtAGGGG	2	148871290	-	4
AGAATACCAGAAAAGCGCAGNGG	AGgATACCAaAAAAcCGCAaGGG	2	150412749	-	4
AGAATACCAGAAAAGCGCAGNGG	AGAATAaCAGAAAAGaGagGAGG	2	153232922	+	4
AGAATACCAGAAAAGCGCAGNGG	AGAATAaCAGAAAtGtGCtGTGG	2	185191679	+	4
AGAATACCAGAAAAGCGCAGNGG	AGAATAtCAGAAAAGaGCAGTGG	2	188208036	+	2	Gon4l	ENSRNOG00000020297	+	overlapping	0	2481.43	-0.0288103	0.909533
AGAATACCAGAAAAGCGCAGNGG	AGAgTACCAGtAAtGaGCAGAGG	2	192937271	+	4
AGAATACCAGAAAAGCGCAGNGG	AGAATACCAcAttAGaGCAGGGG	2	193620496	+	4
AGAATACCAGAAAAGCGCAGNGG	AGAATtCCAGAAAgGaGgAGTGG	2	217642966	+	4
AGAATACCAGAAAAGCGCAGNGG	AGAATgCCAGAcAAGaGCAGAGG	2	262386208	+	3	AABR07013907.1	ENSRNOG00000056191	+	overlapping	0	0	NA	NA
AGAATACCAGAAAAGCGCAGNGG	AGAAgACaAGAAcAGgGCAGGGG	3	2965459	-	4
AGAATACCAGAAAAGCGCAGNGG	AGAAgACaAGAAcAGgGCAGGGG	3	2998211	+	4	LOC103691751	ENSRNOG00000048417	+	overlapping	0	0	NA	NA
AGAATACCAGAAAAGCGCAGNGG	AGAATAaCAGAAcAGatCAGGGG	3	23076292	-	4
AGAATACCAGAAAAGCGCAGNGG	gGtATgCCAGAAAAGtGCAGTGG	3	37161010	-	4
AGAATACCAGAAAAGCGCAGNGG	AGAATACCAtAAAgtCtCAGGGG	3	37498866	+	4
AGAATACCAGAAAAGCGCAGNGG	AGAATACCAaAAAAttGCtGGGG	3	38268128	+	4	Stam2	ENSRNOG00000027447	-	overlapping	0	759.25	0.0565227	0.818195
AGAATACCAGAAAAGCGCAGNGG	AGAATAaaAGAAAActGCAGTGG	3	54565482	-	4	Stk39	ENSRNOG00000024808	-	overlapping	0	1585.09	0.411539	5.87568e-07
AGAATACCAGAAAAGCGCAGNGG	AGAAcACCAGAAAAGgGtAtTGG	3	72055218	-	4
AGAATACCAGAAAAGCGCAGNGG	AGAATtCtAGAAAgGaGCAGAGG	3	72821649	+	4
AGAATACCAGAAAAGCGCAGNGG	AGgAaACCAGAcAAGaGCAGTGG	3	74070535	+	4
AGAATACCAGAAAAGCGCAGNGG	AaAATACCAcAAgAGgGCAGAGG	3	82046135	+	4
AGAATACCAGAAAAGCGCAGNGG	AGAATtCCAGgAAAcgGCAGGGG	3	88951352	+	4
AGAATACCAGAAAAGCGCAGNGG	AGAATtCCAGAAggGaGCAGTGG	3	123409199	-	4
AGAATACCAGAAAAGCGCAGNGG	AGAAaACCAGAAAAGCtCtaAGG	3	126293797	+	4
AGAATACCAGAAAAGCGCAGNGG	gaAgTACCAGAAAAGCtCAGGGG	3	127879585	+	4
AGAATACCAGAAAAGCGCAGNGG	AaAATAgCAGAAgAGgGCAGAGG	3	141144220	-	4	Kiz	ENSRNOG00000025141	+	overlapping	0	385.681	-0.157731	0.548897
AGAATACCAGAAAAGCGCAGNGG	AGAAcAgCAGAAAAGtGCtGAGG	3	143006881	+	4	Gzf1	ENSRNOG00000004735	+	overlapping	0	1300.49	-0.0141189	0.95713
AGAATACCAGAAAAGCGCAGNGG	AGAATACaAGAAAAGaGaAtAGG	3	149740047	-	4	Cdk5rap1	ENSRNOG00000015696	-	overlapping	0	852.601	-0.0676416	0.766723
AGAATACCAGAAAAGCGCAGNGG	cGAATgCCAGAAAAGCcCtGGGG	3	155878305	-	4
AGAATACCAGAAAAGCGCAGNGG	AGAATACCAGAAgtGtGCAaGGG	3	161118860	-	4
AGAATACCAGAAAAGCGCAGNGG	AcAATcCaAGAAAAGCaCAGAGG	3	175068356	-	4
AGAATACCAGAAAAGCGCAGNGG	AGAATACCAGcAAAtaGCAGAGG	4	3348935	+	3
AGAATACCAGAAAAGCGCAGNGG	AGAgTAaCAGAAAAGCaaAGGGG	4	5256783	-	4
AGAATACCAGAAAAGCGCAGNGG	AGAATgtgAaAAAAGCGCAGAGG	4	12503486	+	4
AGAATACCAGAAAAGCGCAGNGG	AGAAgACCAGcAAAcCaCAGAGG	4	58404418	+	4
AGAATACCAGAAAAGCGCAGNGG	AGAATACCAGcAAAcatCAGAGG	4	63262739	+	4
AGAATACCAGAAAAGCGCAGNGG	AGAAcACCAGAAcAcCGCAaTGG	4	67328907	+	4
AGAATACCAGAAAAGCGCAGNGG	AGAAatCCAGAAAcGCGaAGCGG	4	79721541	-	4
AGAATACCAGAAAAGCGCAGNGG	AtAATcCCAGAAcAGaGCAGGGG	4	89054033	+	4
AGAATACCAGAAAAGCGCAGNGG	AGcATACCAGAAgAGaGCAtTGG	4	109376231	+	4
AGAATACCAGAAAAGCGCAGNGG	AGgtTAtCAGAAAAGCGCAGTGG	4	116116926	+	3
AGAATACCAGAAAAGCGCAGNGG	AGAAcACCAGAgAAGgGCAGAGG	4	119585319	-	3	AC097129.1	ENSRNOG00000031408	-	overlapping	0	1.29364	0.450428	NA
AGAATACCAGAAAAGCGCAGNGG	AcAAcACCAGAAAAGgGCAcTGG	4	129502766	-	4	Eogt	ENSRNOG00000024533	-	overlapping	0	1089.67	-0.0323015	0.897919
AGAATACCAGAAAAGCGCAGNGG	AGgATtaCAGAAAAGCtCAGGGG	4	138456311	-	4	Cntn4	ENSRNOG00000005652	+	overlapping	0	155.26	-0.532349	0.0405275
AGAATACCAGAAAAGCGCAGNGG	AGcAaACCAGAAgAGgGCAGAGG	4	154360567	+	4	LOC100911545	ENSRNOG00000028896	+	upstream	1430	0.12371	0.566278	NA
AGAATACCAGAAAAGCGCAGNGG	AGcAaACCAGAAgAGgGCAGAGG	4	154474467	+	4	LOC297568	ENSRNOG00000037188	+	overlapping	0	2.5204	-0.998063	NA
AGAATACCAGAAAAGCGCAGNGG	AGgATACCAGAAgAGgGCAtTGG	4	157665784	+	4	Iffo1	ENSRNOG00000018533	+	overlapping	0	1448.82	-0.0593195	0.73898
AGAATACCAGAAAAGCGCAGNGG	cGAATgCCAGAAAAGgGCAcTGG	4	171980695	+	4	Slc15a5	ENSRNOG00000007717	-	overlapping	0	0	NA	NA
AGAATACCAGAAAAGCGCAGNGG	AGAATttCAGAgAAGCcCAGGGG	4	176069825	+	4
AGAATACCAGAAAAGCGCAGNGG	AGAATttCAGAgAAGCcCAGGGG	4	181922135	-	4	Ccdc91	ENSRNOG00000001847	+	overlapping	0	1243.94	-0.117604	0.465438
AGAATACCAGAAAAGCGCAGNGG	AGAATAgCAtAAAAtaGCAGTGG	4	184155302	+	4	Bicd1	ENSRNOG00000036911	+	overlapping	0	800.423	-0.0447947	0.90158
AGAATACCAGAAAAGCGCAGNGG	AGAgTAgCAGAAAAGaGgAGAGG	5	815460	+	4	Pi15	ENSRNOG00000017686	-	overlapping	0	2.60467	-1.72967	NA
AGAATACCAGAAAAGCGCAGNGG	AGAAaACtAGAAAAGgGCAGTGG	5	5342462	-	3
AGAATACCAGAAAAGCGCAGNGG	AGcATgCCAGAAgAGCcCAGTGG	5	18364727	-	4
AGAATACCAGAAAAGCGCAGNGG	AGAATACCtGAAgAGaGgAGAGG	5	19503162	+	4	Nsmaf	ENSRNOG00000010234	-	overlapping	0	1133.1	-0.00816375	0.973212
AGAATACCAGAAAAGCGCAGNGG	AcAATACCAGAAgAGaGCAGTGG	5	19572715	+	3
AGAATACCAGAAAAGCGCAGNGG	AGAATACaAGAAAAataCAGAGG	5	20385600	-	4
AGAATACCAGAAAAGCGCAGNGG	AGAAaAgCAGgAAAGCGCAaAGG	5	42036826	-	4
AGAATACCAGAAAAGCGCAGNGG	AGAAaACCAGtgAgGCGCAGAGG	5	49895516	+	4
AGAATACCAGAAAAGCGCAGNGG	AGAAcACCAGAAgAGgGCAtCGG	5	63129771	-	4
AGAATACCAGAAAAGCGCAGNGG	AGgATgCCAGAAAAGgGCAtTGG	5	71675537	-	4
AGAATACCAGAAAAGCGCAGNGG	AGAAgtCCAGAgAAGtGCAGGGG	5	73380752	-	4
AGAATACCAGAAAAGCGCAGNGG	AcAATACCAGAgAAcaGCAGCGG	5	75772951	-	4
AGAATACCAGAAAAGCGCAGNGG	AGAATAgCttAAAAGaGCAGAGG	5	78839682	-	4	Zfp618	ENSRNOG00000006719	+	overlapping	0	180.756	0.203701	0.65474
AGAATACCAGAAAAGCGCAGNGG	AaAATtCtAGAAAAGCtCAGAGG	5	85127669	+	4	AABR07048624.1	ENSRNOG00000052703	+	overlapping	0	1.40552	0.36684	NA
AGAATACCAGAAAAGCGCAGNGG	AGAATACCAGcAAAtacCAGAGG	5	91493019	+	4
AGAATACCAGAAAAGCGCAGNGG	AGAATgCCAGtgAAGCaCAGAGG	5	108674578	-	4
AGAATACCAGAAAAGCGCAGNGG	tGAATcCCAGAAAAtaGCAGAGG	5	120569168	+	4	Leprot	ENSRNOG00000023664	+	overlapping	0	15.4225	0.790121	NA
AGAATACCAGAAAAGCGCAGNGG	AGAAggCCAGAAAAGgGCAtTGG	5	128003135	+	4	Gpx7	ENSRNOG00000009751	-	overlapping	0	59.6154	-0.327324	0.607253
AGAATACCAGAAAAGCGCAGNGG	AGgATgaCAGAAtAGCGCAGAGG	5	137812593	+	4	Olr865	ENSRNOG00000058382	-	overlapping	0	0	NA	NA
AGAATACCAGAAAAGCGCAGNGG	AGgATgCCAcAAAAGgGCAGGGG	5	139174303	+	4
AGAATACCAGAAAAGCGCAGNGG	AGgAgACCAGAgAAtCGCAGGGG	5	139825927	+	4
AGAATACCAGAAAAGCGCAGNGG	AGAAatCaAGAAAAGaGCAGTGG	5	143052427	+	4	Gnl2	ENSRNOG00000009430	+	overlapping	0	1883.05	0.104002	0.480182
AGAATACCAGAAAAGCGCAGNGG	AGAATACCAGAAgAGgGCAcCGG	5	150605731	-	3	Phactr4	ENSRNOG00000046922	-	overlapping	0	360.418	-0.0406127	0.912694
AGAATACCAGAAAAGCGCAGNGG	AGAAcACCAGAAgAGgGCAtCGG	5	151158486	-	4
AGAATACCAGAAAAGCGCAGNGG	AGAAcACCAGAAgAGgGCAtCGG	5	151391838	+	4
AGAATACCAGAAAAGCGCAGNGG	AGAATgCCAGAAgcGtGCAGTGG	5	159146778	-	4
AGAATACCAGAAAAGCGCAGNGG	tGcATACCAGAAAAGaGCAtCGG	6	21924332	-	4
AGAATACCAGAAAAGCGCAGNGG	AGgATACCAGcAAAGgtCAGGGG	6	29330565	-	4	Klhl29	ENSRNOG00000005371	-	overlapping	0	761.148	0.0253354	0.927592
AGAATACCAGAAAAGCGCAGNGG	AGAATACCAtAAgAGaaCAGTGG	6	36675260	+	4
AGAATACCAGAAAAGCGCAGNGG	AGAATtCCcGAAAAGaaCAGTGG	6	60733931	+	4	Dock4	ENSRNOG00000004823	+	overlapping	0	1166.49	-0.242619	0.039472
AGAATACCAGAAAAGCGCAGNGG	AGAATAtCAGAAtAGgGCAtTGG	6	71251081	-	4	Prkd1	ENSRNOG00000004165	-	overlapping	0	446.878	-0.106362	0.665018
AGAATACCAGAAAAGCGCAGNGG	AGAtTACCAtAAAAagGCAGAGG	6	90685004	+	4	AABR07064690.1	ENSRNOG00000060564	-	downstream	1427	0	NA	NA
AGAATACCAGAAAAGCGCAGNGG	AGAtTACCAtAAAAagGCAGAGG	6	90956707	+	4	AABR07064697.1	ENSRNOG00000060044	-	downstream	1427	0	NA	NA
AGAATACCAGAAAAGCGCAGNGG	AGAAaACCAGAAAAcaGCAtCGG	6	99453193	-	4	Ppp1r36	ENSRNOG00000038480	+	overlapping	0	90.1926	-0.444674	0.285344
AGAATACCAGAAAAGCGCAGNGG	tGAAggCCAGAAAAGgGCAGTGG	6	109068930	+	4	Mlh3	ENSRNOG00000006699	-	overlapping	0	517.938	-0.191001	0.315818
AGAATACCAGAAAAGCGCAGNGG	AGAAaACagGAAAAGCcCAGGGG	6	111139633	+	4	Pomt2	ENSRNOG00000012146	-	overlapping	0	1507.47	-0.0912641	0.553942
AGAATACCAGAAAAGCGCAGNGG	AGAATACCAGAtAtGCtCAGTGG	6	122057193	-	3
AGAATACCAGAAAAGCGCAGNGG	AGAAggCCAGAAAAGgGCAtTGG	6	131516347	-	4
AGAATACCAGAAAAGCGCAGNGG	AaAAcAtCAGAAAAGCaCAGAGG	7	6732122	-	4
AGAATACCAGAAAAGCGCAGNGG	AaAATAtCAGAAAAGCaCAGAGG	7	7727690	-	3
AGAATACCAGAAAAGCGCAGNGG	AGAAcACCAGAAgAGgGCAtCGG	7	12716403	-	4	Hmha1	ENSRNOG00000013220	-	overlapping	0	8.73775	0.882314	NA
AGAATACCAGAAAAGCGCAGNGG	tGAATtCCAGAAgAGgGCAGGGG	7	15462354	+	4
AGAATACCAGAAAAGCGCAGNGG	AGtATACaAGAAAtGCcCAGAGG	7	18560049	-	4	March2	ENSRNOG00000007769	-	overlapping	0	1684.16	0.0206879	0.927592
AGAATACCAGAAAAGCGCAGNGG	AGAATACaAGcAAgcCGCAGCGG	7	24999619	-	4
AGAATACCAGAAAAGCGCAGNGG	AGAAgACCAGAAAAcCaCAcCGG	7	28602127	-	4
AGAATACCAGAAAAGCGCAGNGG	AGAATtaCAaAAAAGCtCAGGGG	7	33402723	-	4
AGAATACCAGAAAAGCGCAGNGG	AGAAacCCAGAAcAtCGCAGCGG	7	36025089	+	4
AGAATACCAGAAAAGCGCAGNGG	AGAATACaAGAgAAtCtCAGTGG	7	97140591	+	4
AGAATACCAGAAAAGCGCAGNGG	AGAATACaAGAgAAGCcCtGAGG	7	109277380	-	4
AGAATACCAGAAAAGCGCAGNGG	AGAAcACCAGAgAAcaGCAGTGG	7	112077571	+	4
AGAATACCAGAAAAGCGCAGNGG	ctAATgCCAGAAAAGCcCAGAGG	7	123170830	+	4	Csdc2	ENSRNOG00000005332	+	overlapping	0	8500.29	0.20099	0.0454175
AGAATACCAGAAAAGCGCAGNGG	AtAATACCAGAtAAtCaCAGAGG	7	127704312	-	4
AGAATACCAGAAAAGCGCAGNGG	gcAATACCAGAcAAGaGCAGTGG	7	128289370	+	4
AGAATACCAGAAAAGCGCAGNGG	AaAtTcCCAGAAAAGaGCAGTGG	7	132271747	-	4
AGAATACCAGAAAAGCGCAGNGG	AGAATACCAGcAAAataCAGAGG	7	133688811	+	4
AGAATACCAGAAAAGCGCAGNGG	AGAAgtCCAGAAAAGCagAGAGG	7	140695646	-	4
AGAATACCAGAAAAGCGCAGNGG	AGAAcACCAGAAgAGgGCAtTGG	7	143952315	-	4	Aaas	ENSRNOG00000013445	-	overlapping	0	1110.59	-0.125631	0.476405
AGAATACCAGAAAAGCGCAGNGG	AGAAcAgCAGAAAAGCaCcGTGG	8	8093817	-	4	Cntn5	ENSRNOG00000007038	-	overlapping	0	66.675	-0.203693	0.772421
AGAATACCAGAAAAGCGCAGNGG	AcAATACaAGAAAAGaGaAGAGG	8	20357879	-	4	Olr1169	ENSRNOG00000047916	+	downstream	393	0	NA	NA
AGAATACCAGAAAAGCGCAGNGG	AcAATACaAGAAAAGaGaAGAGG	8	21033396	-	4	LOC100911547	ENSRNOG00000048711	+	downstream	393	0	NA	NA
AGAATACCAGAAAAGCGCAGNGG	AGAAgACCAGAAAcGgGCAtGGG	8	21769767	+	4
AGAATACCAGAAAAGCGCAGNGG	AGAAaACCAGAAgAGacCAGGGG	8	29083887	-	4
AGAATACCAGAAAAGCGCAGNGG	gGAAgACCAGAAAAGCcCAtTGG	8	34314408	-	4
AGAATACCAGAAAAGCGCAGNGG	tGAATACaAGAAAgGCaCAGGGG	8	47308251	+	4	Arhgef12	ENSRNOG00000008924	-	overlapping	0	3266.62	-0.203149	0.189118
AGAATACCAGAAAAGCGCAGNGG	AGAAgACCAGAgAAtCtCAGAGG	8	56238865	+	4	Arhgap20	ENSRNOG00000025624	+	overlapping	0	1903.77	0.0260012	0.906166
AGAATACCAGAAAAGCGCAGNGG	tGAAaACCAGAAAAGgGCAtTGG	8	67530101	-	4
AGAATACCAGAAAAGCGCAGNGG	AGAAgACCAGAgAAGgGCAtTGG	8	67970123	+	4
AGAATACCAGAAAAGCGCAGNGG	AGgATcCCAGctAAGCGCAGAGG	8	68454381	+	4	Iqch	ENSRNOG00000008353	-	overlapping	0	1.53162	-2.17666	NA
AGAATACCAGAAAAGCGCAGNGG	AGAgTACCAGAAtAtgGCAGAGG	8	72730601	-	4
AGAATACCAGAAAAGCGCAGNGG	gGgAgACCAGAAAAGCcCAGGGG	8	79020628	+	4
AGAATACCAGAAAAGCGCAGNGG	AGAATACCAGcAAAcacCAGAGG	8	80143062	-	4
AGAATACCAGAAAAGCGCAGNGG	AGAAcACCAGAAgAGgGCAtCGG	8	85512473	+	4	Gsta4	ENSRNOG00000030449	+	overlapping	0	1668.71	-0.0505777	0.852614
AGAATACCAGAAAAGCGCAGNGG	AGAATACaAGAAtAGCGCgaGGG	8	93000754	-	4
AGAATACCAGAAAAGCGCAGNGG	AGAcaACCAGAAAAGCaCAtTGG	8	99078780	-	4
AGAATACCAGAAAAGCGCAGNGG	AGAAaAagAGAAAAGCcCAGAGG	8	103518499	-	4	Trpc1	ENSRNOG00000054902	-	overlapping	0	732.901	-0.0689371	0.812598
AGAATACCAGAAAAGCGCAGNGG	AGAAgAgCAGAAAAGgGaAGAGG	8	132747318	+	4	RGD1566368	ENSRNOG00000006010	-	overlapping	0	0.47233	0.55117	NA
AGAATACCAGAAAAGCGCAGNGG	AGAATAtCAGcAAAGaGCAaGGG	9	33415861	+	4
AGAATACCAGAAAAGCGCAGNGG	AGAAaAgCAGAAAAGaGCAaGGG	9	39427833	-	4
AGAATACCAGAAAAGCGCAGNGG	AGAAcACCAGAAgAGgGCAcCGG	9	79552648	+	4
AGAATACCAGAAAAGCGCAGNGG	AGAATACtAGcAAAtaGCAGAGG	9	101785087	-	4
AGAATACCAGAAAAGCGCAGNGG	AGAcTtCtAGAAAAGCtCAGCGG	9	109755531	+	4
AGAATACCAGAAAAGCGCAGNGG	AGgAgACCAGAAAAGgGCAcAGG	9	113751856	+	4
AGAATACCAGAAAAGCGCAGNGG	AGAAcACCAGAAgAGgGCAtCGG	10	22775	-	4	AABR07028907.1	ENSRNOG00000057054	-	overlapping	0	23.0935	-0.417135	0.669408
AGAATACCAGAAAAGCGCAGNGG	AGAAcACCAGAAgAGgGCAtCGG	10	903338	-	4
AGAATACCAGAAAAGCGCAGNGG	AGAATgCCAGAAAAcCagAGAGG	10	4880494	+	4
AGAATACCAGAAAAGCGCAGNGG	AGgATcCCAGAAAAcaGCAGGGG	10	13736710	-	4	Abca3	ENSRNOG00000050057	+	overlapping	0	7683.02	0.0519053	0.80527
AGAATACCAGAAAAGCGCAGNGG	AGAgTtCCAGAAgAGgGCAGGGG	10	32149012	-	4	Sgcd	ENSRNOG00000002372	-	overlapping	0	33.4922	-0.534644	0.478592
AGAATACCAGAAAAGCGCAGNGG	AGAATcCCAaAAgAGtGCAGTGG	10	34602401	+	4
AGAATACCAGAAAAGCGCAGNGG	AaAATACCAGAAAAGgGtAtGGG	10	40556681	-	4	Slc36a1	ENSRNOG00000012356	+	overlapping	0	1285.68	0.0420284	0.87009
AGAATACCAGAAAAGCGCAGNGG	AcAAccCCAGAAAAGgGCAGGGG	10	61752102	-	4	Tsr1	ENSRNOG00000002980	+	overlapping	0	1836.47	0.0342491	0.874837
AGAATACCAGAAAAGCGCAGNGG	AGAAcgCCAGAAAAGgGCAtTGG	10	74113633	-	4	Dhx40	ENSRNOG00000004549	-	overlapping	0	1263.24	-0.17245	0.235648
AGAATACCAGAAAAGCGCAGNGG	gGAAggCCAGAAAAGgGCAGCGG	10	85838625	-	4
AGAATACCAGAAAAGCGCAGNGG	AGAATAgCAGAAtgGCcCAGGGG	10	86346544	+	4	Pgap3	ENSRNOG00000046143	-	overlapping	0	396.201	0.233841	0.284051
AGAATACCAGAAAAGCGCAGNGG	AGAATAaaAGAAAAGgGgAGGGG	10	86971584	-	4
AGAATACCAGAAAAGCGCAGNGG	AccATcCCAGAAAgGCGCAGAGG	10	109221280	+	4	Aatk	ENSRNOG00000004392	-	overlapping	0	3232.22	0.0848228	0.651512
AGAATACCAGAAAAGCGCAGNGG	tGAATgCCAcAAAAGaGCAGGGG	11	32181012	+	4
AGAATACCAGAAAAGCGCAGNGG	tGAATACatGAAAAGCaCAGAGG	11	71077021	-	4	Iqcg	ENSRNOG00000026420	+	overlapping	0	12.2615	0.0307599	NA
AGAATACCAGAAAAGCGCAGNGG	AGAATcCCAGAgAAGCcCAtAGG	11	80872770	-	4
AGAATACCAGAAAAGCGCAGNGG	AGAATACCAGAAgAaaaCAGAGG	11	84143316	-	4
AGAATACCAGAAAAGCGCAGNGG	AGAATAaCAGAtcAGgGCAGAGG	12	15595424	-	4
AGAATACCAGAAAAGCGCAGNGG	AGAATAaCAGAcAAGaGCAGAGG	12	19706086	-	3	AABR07035561.3	ENSRNOG00000058864	+	overlapping	0	0	NA	NA
AGAATACCAGAAAAGCGCAGNGG	AGAATAaCAGAcAAGaGCAGAGG	12	19882363	-	3	Vom2r62	ENSRNOG00000050572	-	overlapping	0	0	NA	NA
AGAATACCAGAAAAGCGCAGNGG	AGAATAaCAGAcAAGaGCAGAGG	12	20207472	+	3
AGAATACCAGAAAAGCGCAGNGG	AGAATAaCAGAcAAGaGCAGAGG	12	20212447	+	3
AGAATACCAGAAAAGCGCAGNGG	AGAATAaCAGAcAAGaGCgGAGG	12	20222651	+	4
AGAATACCAGAAAAGCGCAGNGG	AGAATAaCAGAcAAGaGCAGAGG	12	20245853	+	3
AGAATACCAGAAAAGCGCAGNGG	AGAATAaaAGAcAAGaGCAGAGG	12	20254440	+	4
AGAATACCAGAAAAGCGCAGNGG	AGcATAaCAGAcAAGaGCAGAGG	12	20313993	+	4
AGAATACCAGAAAAGCGCAGNGG	AGAATAaCAGAcAAGaGCAGAGG	12	20542897	+	3	AABR07035622.1	ENSRNOG00000051614	-	upstream	338	0	NA	NA
AGAATACCAGAAAAGCGCAGNGG	AGAATAaaAGAcAAGaGCAGAGG	12	20820480	+	4	AABR07035650.2	ENSRNOG00000061750	-	overlapping	0	0	NA	NA
AGAATACCAGAAAAGCGCAGNGG	AGAATAaCAGAcAAGaGCAGAGG	12	21305150	+	3
AGAATACCAGAAAAGCGCAGNGG	AGAATAaCAGAcAAGaGCAGAGG	12	21322911	+	3
AGAATACCAGAAAAGCGCAGNGG	AGAATAaCAGAcAAGaGCAGAGG	12	21347064	+	3
AGAATACCAGAAAAGCGCAGNGG	AGAATgCCAGgAAAGgGCAtCGG	12	39647459	+	4
AGAATACCAGAAAAGCGCAGNGG	AGAAcACCAGAAgAGaGCAtCGG	12	40837564	+	4
AGAATACCAGAAAAGCGCAGNGG	AGAATAaCAGAAAgGaGgAGTGG	13	3579567	+	4
AGAATACCAGAAAAGCGCAGNGG	AGAAcACCAGAAAAGaaaAGAGG	13	32933596	-	4
AGAATACCAGAAAAGCGCAGNGG	AGAATACCAGcAAAtaGCAGAGG	13	56634660	-	3
AGAATACCAGAAAAGCGCAGNGG	AGAAaACCAGAAAAGaaaAGGGG	13	67469026	+	4
AGAATACCAGAAAAGCGCAGNGG	AGAAaAaCAGAAAAGaGCAtTGG	13	69902571	+	4	Colgalt2	ENSRNOG00000028207	+	upstream	1401	203.325	0.0838774	0.84537
AGAATACCAGAAAAGCGCAGNGG	AGAAaACCAGAAgAGgGCAcAGG	13	73533802	+	4	Cep350	ENSRNOG00000003882	-	overlapping	0	1558.02	-0.18336	0.40469
AGAATACCAGAAAAGCGCAGNGG	AtAgTACCAGAgAAGCcCAGGGG	13	75225477	+	4
AGAATACCAGAAAAGCGCAGNGG	AtAgTACCAGAgAAGCcCAGGGG	13	75249684	+	4
AGAATACCAGAAAAGCGCAGNGG	AGttTACCAGAAAAGCtaAGAGG	13	86641432	+	4
AGAATACCAGAAAAGCGCAGNGG	AaAAggCCAGAAAAGgGCAGGGG	13	89617539	+	4	Ndufs2	ENSRNOG00000038372	-	overlapping	0	6160.18	-0.000167158	0.999584
AGAATACCAGAAAAGCGCAGNGG	AGtATAgCAGcAAAGCcCAGAGG	13	98309674	-	4	Cdc42bpa	ENSRNOG00000002841	+	overlapping	0	5995.48	-0.0228173	0.931835
AGAATACCAGAAAAGCGCAGNGG	AGAATgCCAGAAgAGacCAGAGG	13	109182049	+	4
AGAATACCAGAAAAGCGCAGNGG	AaAATACCAGAgAAGCatAGAGG	13	113351437	+	4
AGAATACCAGAAAAGCGCAGNGG	AGAAaACtAGAgAAGCGCAaAGG	14	8619284	+	4
AGAATACCAGAAAAGCGCAGNGG	AGAAgtCCAGAAgAGgGCAGCGG	14	19055872	+	4	LOC360919	ENSRNOG00000039504	-	overlapping	0	118.486	-0.268056	0.51084
AGAATACCAGAAAAGCGCAGNGG	AGcAcACCAGAAAAGgGCAaCGG	14	20921597	-	4	Slc4a4	ENSRNOG00000003134	-	downstream	1311	1178.12	-0.291438	0.0836883
AGAATACCAGAAAAGCGCAGNGG	AGAATACCAtAAAtGCGtgGGGG	14	27065769	+	4
AGAATACCAGAAAAGCGCAGNGG	AGAggAaCAGAAAAGCaCAGAGG	14	60009145	+	4
AGAATACCAGAAAAGCGCAGNGG	tGcATACCAGAAAAGgGCAtTGG	14	60302075	+	4
AGAATACCAGAAAAGCGCAGNGG	AGAAcACCAGAAcAGaGCtGTGG	14	76933346	+	4
AGAATACCAGAAAAGCGCAGNGG	AGgAgACCAGAAAAGaGCAaTGG	14	84155811	-	4	Dusp18	ENSRNOG00000024945	+	overlapping	0	2113.65	-0.126506	0.310311
AGAATACCAGAAAAGCGCAGNGG	AGAATACgAGAAgAaaGCAGTGG	14	86215569	-	4	Camk2b	ENSRNOG00000052080	-	overlapping	0	16763.4	0.189177	0.032732
AGAATACCAGAAAAGCGCAGNGG	AGAATACCAGcAAAtaaCAGAGG	14	99875820	+	4
AGAATACCAGAAAAGCGCAGNGG	AcAtTcCCAGAAAAGCaCAGTGG	14	107399787	-	4
AGAATACCAGAAAAGCGCAGNGG	AGAAgAaCAaAAAAGtGCAGGGG	15	6819509	+	4
AGAATACCAGAAAAGCGCAGNGG	AGAAaAaCAGAAAgGaGCAGAGG	15	14176686	+	4
AGAATACCAGAAAAGCGCAGNGG	AGAAcACCAGAAAgaCtCAGAGG	15	14380923	+	4
AGAATACCAGAAAAGCGCAGNGG	AGAAcACCAGAAgAGgGCAcTGG	15	37315989	+	4	Gja3	ENSRNOG00000008847	-	overlapping	0	9.35917	0.35224	NA
AGAATACCAGAAAAGCGCAGNGG	AtAAaACCAGAAAgGCtCAGGGG	15	47164308	+	4	Xkr6	ENSRNOG00000011634	+	overlapping	0	55.8678	-0.0123036	0.990507
AGAATACCAGAAAAGCGCAGNGG	AaAATACCAcAAAAGgGCAtAGG	15	60210561	+	4
AGAATACCAGAAAAGCGCAGNGG	AGtATAaCAGAAAActGCAGAGG	15	63161699	-	4
AGAATACCAGAAAAGCGCAGNGG	AGgAgACCAGAAAAGgGCAtTGG	16	894681	-	4	LOC100363675	ENSRNOG00000011119	-	overlapping	0	678.473	-0.126146	0.51084
AGAATACCAGAAAAGCGCAGNGG	AGAATAtCAGAAgAGaGgAGAGG	16	14619791	+	4
AGAATACCAGAAAAGCGCAGNGG	AGAATAtCAGAAAAcCtgAGGGG	16	21057054	-	4	Ncan	ENSRNOG00000048036	+	overlapping	0	13971.2	-0.054585	0.732872
AGAATACCAGAAAAGCGCAGNGG	AGgtTACCAGAAAAaCaCAGAGG	16	50097192	-	4	Fam149a	ENSRNOG00000021693	+	overlapping	0	745.903	0.264935	0.0499196
AGAATACCAGAAAAGCGCAGNGG	gGAATAgCAGAAcAGaGCAGTGG	16	59710637	+	4	Pragmin	ENSRNOG00000011407	-	overlapping	0	1219.36	0.0810109	0.665362
AGAATACCAGAAAAGCGCAGNGG	AGAATcCtAGAAAAGCtgAGAGG	16	60742971	-	4
AGAATACCAGAAAAGCGCAGNGG	AGAATACCAcAAAAcatCAGAGG	16	79114122	-	4
AGAATACCAGAAAAGCGCAGNGG	ActATAtCAGAAgAGCGCAGGGG	16	84317326	-	4
AGAATACCAGAAAAGCGCAGNGG	AGgATACtAGAAAAGgGCAcTGG	16	86537518	+	4	AABR07026614.1	ENSRNOG00000056366	+	downstream	393	0	NA	NA
AGAATACCAGAAAAGCGCAGNGG	AGgATACtAGAAAAGgGCAcTGG	16	86538583	+	4	AABR07026614.1	ENSRNOG00000056366	+	overlapping	0	0	NA	NA
AGAATACCAGAAAAGCGCAGNGG	AGAAgACCAGAAgAGaGCAcTGG	17	1646756	+	4	Slc35d2	ENSRNOG00000027229	-	overlapping	0	38.097	0.58793	0.335172
AGAATACCAGAAAAGCGCAGNGG	AGAAgACCAGAAAgGgGCAtGGG	17	13419888	-	4	AABR07027080.1	ENSRNOG00000060331	+	overlapping	0	0.12371	0.566278	NA
AGAATACCAGAAAAGCGCAGNGG	AGgAgACCAGAAAAGgGCAtTGG	17	14092052	-	4	AABR07027088.1	ENSRNOG00000046068	-	downstream	286	0.12371	0.566278	NA
AGAATACCAGAAAAGCGCAGNGG	AGAATttCAGAAAgGtGCAGGGG	17	33129713	+	4
AGAATACCAGAAAAGCGCAGNGG	AGAATACCAGcAAAtacCAGAGG	17	47557789	-	4
AGAATACCAGAAAAGCGCAGNGG	AGAATACCAGcAAActaCAGAGG	17	58061716	+	4
AGAATACCAGAAAAGCGCAGNGG	AGAATACCAGcAAAcCaCAGAGG	17	60356600	+	3	Armc4	ENSRNOG00000018905	+	overlapping	0	2.23201	2.31076	NA
AGAATACCAGAAAAGCGCAGNGG	cGgATACCAGAAAAGgGCAtAGG	17	64944229	+	4
AGAATACCAGAAAAGCGCAGNGG	AGgATACCgGgAAAGCcCAGTGG	17	70636588	+	4
AGAATACCAGAAAAGCGCAGNGG	AGgAgACCAGAAAAGgGCAcTGG	17	87267141	+	4
AGAATACCAGAAAAGCGCAGNGG	AGAATACaAGAAAgGgGCtGTGG	18	1269673	-	4
AGAATACCAGAAAAGCGCAGNGG	AGAATAtCAaAgAAGCGCAGGGG	18	8182573	+	3	Cdh2	ENSRNOG00000015602	-	overlapping	0	9427.12	-0.0430585	0.744882
AGAATACCAGAAAAGCGCAGNGG	AGAATACCAGcAAAataCAGAGG	18	22745483	+	4
AGAATACCAGAAAAGCGCAGNGG	AGAATgCCAGAgAAaCaCAGAGG	18	43189542	+	4
AGAATACCAGAAAAGCGCAGNGG	AGgAggCCAGAAAAGgGCAGTGG	18	56667751	-	4	Ppargc1b	ENSRNOG00000017503	-	overlapping	0	122.952	0.141549	0.812873
AGAATACCAGAAAAGCGCAGNGG	AacATACCAGAAAAGaGCAtCGG	18	68979915	+	4	LOC361346	ENSRNOG00000028677	-	overlapping	0	670.746	-0.222183	0.201214
AGAATACCAGAAAAGCGCAGNGG	AGAAaACCAGAAAgGgaCAGAGG	18	79127521	-	4
AGAATACCAGAAAAGCGCAGNGG	AaAAgACCAGAAAAGgGCtGAGG	19	1154642	+	4
AGAATACCAGAAAAGCGCAGNGG	AGAAgAaCAGAcAAGCaCAGAGG	19	37032321	-	4	Ces2g	ENSRNOG00000013808	+	overlapping	0	2.14686	1.43246	NA
AGAATACCAGAAAAGCGCAGNGG	AGAAcACCAGAAgAGgGCAcCGG	19	52015256	-	4
AGAATACCAGAAAAGCGCAGNGG	AGAATAaCAGAcAAGaGCtGTGG	19	56218151	+	4	Mc1r	ENSRNOG00000038193	+	upstream	385	2.0153	0.812762	NA
AGAATACCAGAAAAGCGCAGNGG	AGAATACaAGccAAGCaCAGTGG	20	5073127	-	4	Ly6g6f	ENSRNOG00000027225	-	overlapping	0	0	NA	NA
AGAATACCAGAAAAGCGCAGNGG	AGgAcACCAGAAAAGgGCAcTGG	20	10413006	-	4
AGAATACCAGAAAAGCGCAGNGG	AGAAcACCAGAAgAGgGCAtCGG	20	18698708	+	4
AGAATACCAGAAAAGCGCAGNGG	AGAATACCAGAgAAGCaaAaGGG	20	54249563	+	4	Grik2	ENSRNOG00000000368	-	overlapping	0	1548.61	-0.25716	0.0116382
AGAATACCAGAAAAGCGCAGNGG	tGAATACCAGAgtAGgGCAGTGG	20	55103635	+	4
AGAATACCAGAAAAGCGCAGNGG	AGAAaACCAGggAAGCGCAaAGG	X	47978033	+	4
AGAATACCAGAAAAGCGCAGNGG	AGAATACaAGAgAAtCtCAGCGG	X	59957101	+	4
AGAATACCAGAAAAGCGCAGNGG	AGAAaACCAGAAAAGCcCAGTGG	X	71826054	+	2
AGAATACCAGAAAAGCGCAGNGG	AaAATcCCAGAAAAGCcCAGGGG	X	107020063	-	3
AGAATACCAGAAAAGCGCAGNGG	AaAATACCAGAAcAtCtCAGGGG	X	124907991	-	4	Mcts1	ENSRNOG00000002563	+	upstream	1829	1249.03	-0.0613858	0.808191
AGAATACCAGAAAAGCGCAGNGG	AGgATACCAGAAAAtgaCAGAGG	X	134612538	-	4
AGAATACCAGAAAAGCGCAGNGG	AGAATAggAGAgAAGCcCAGAGG	X	149322335	-	4
AGAATACCAGAAAAGCGCAGNGG	AcAAaAgCAGAAAAGaGCAGGGG	X	157213177	-	4
AGAATACCAGAAAAGCGCAGNGG	AtgATACCgGAAAAGgGCAGAGG	Y	397278	+	4
AGAATACCAGAAAAGCGCAGNGG	AtgATACCgGAAAAGgGCAGAGG	Y	662473	-	4
AGAATACCAGAAAAGCGCAGNGG	AtgATACCgGAAAAGgGCAGAGG	Y	729045	-	4
