# Supplementary material for: A Neuron-Optimized CRISPR/dCas9 Activation System for Robust and Specific Gene Regulation
Source: eNeuro. 2019 Mar 7;6(1):ENEURO.0495-18.2019. doi: 10.1523/ENEURO.0495-18.2019 (PMC6412672; doi:10.1523/ENEURO.0495-18.2019)
Supplement: Extended Data Table 4-2 — Download Table 4-2, XLSX file. [file sup_enu-eN-MNT-0495-18-s07.xlsx]

## Sheet: Bdnf IV sgRNA off-target 
Table 4-2: Off-target predictions Bdnf IV sgRNA
crRNA sequence	DNA match	Chromosome	Position	Direction	Mismatches	Annotated Feature	Ensebmle ID	Feature Strand	Orientation	Distance	Basemean	Log2(Fold change)	padj
GCACTAGAGTGTCTATTTCGNGG	GCACaAGgcTGTCTATTTCtGGG	1	31935151	+	4
GCACTAGAGTGTCTATTTCGNGG	GaACaAGAGTGcCTATTgCGAGG	1	101759375	+	4
GCACTAGAGTGTCTATTTCGNGG	GgACaAcAGTGTCTATTTaGGGG	1	268388368	+	4
GCACTAGAGTGTCTATTTCGNGG	GCACcAGAGTGTCccTTTtGTGG	2	144745595	+	4	Fstl1	ENSRNOG00000002746	-	overlapping	0	1413.06	-0.0315401	0.90411
GCACTAGAGTGTCTATTTCGNGG	GCtCTgGAGTGTCTgTTTCGTGG	2	170861009	+	3
GCACTAGAGTGTCTATTTCGNGG	GCACTtGAGTGTCTtTcTtGGGG	2	202617522	+	4
GCACTAGAGTGTCTATTTCGNGG	GCACTAGAGaaTCcATTTCtGGG	2	204612346	+	4
GCACTAGAGTGTCTATTTCGNGG	GCACTAGttTGTCTcTTaCGGGG	2	209503703	-	4
GCACTAGAGTGTCTATTTCGNGG	tCtCaAGAGTGTgTATTTCGCGG	2	248303587	-	4
GCACTAGAGTGTCTATTTCGNGG	aCAtTAtAGTGTCTATTTgGTGG	3	60564069	-	4	Zdhhc11	ENSRNOG00000039743	-	overlapping	0	14.7893	0.564414	0.558149
GCACTAGAGTGTCTATTTCGNGG	GCcCTAGAGTtTCTcTTTCaAGG	3	61667671	-	4	Sult2b1	ENSRNOG00000021046	-	overlapping	0	214.286	0.267972	0.392871
GCACTAGAGTGTCTATTTCGNGG	GCACgAGAGTGTgcATTTCcCGG	3	79673055	-	4	Sorcs3	ENSRNOG00000028832	+	overlapping	0	383.321	0.714026	0.00617011
GCACTAGAGTGTCTATTTCGNGG	GCACaAGtGTGTaTATTTCtGGG	3	92654609	-	4	Dclk1	ENSRNOG00000032922	+	overlapping	0	17641.5	0.165119	0.330907
GCACTAGAGTGTCTATTTCGNGG	GaACaAGAGTtTCTtTTTCGTGG	3	97613792	-	4
GCACTAGAGTGTCTATTTCGNGG	GCACcAcAGTGTCTcTTTgGGGG	3	118025150	+	4
GCACTAGAGTGTCTATTTCGNGG	GCACTAGAaTGTCTtTTcaGGGG	3	120756952	+	4	Vangl1	ENSRNOG00000016477	-	overlapping	0	1013.68	0.103456	0.625009
GCACTAGAGTGTCTATTTCGNGG	GCcCTAGAGTGTCTcTcTCGGGG	3	172045543	+	3	Cd53	ENSRNOG00000017874	-	overlapping	0	2.40572	-0.889274	NA
GCACTAGAGTGTCTATTTCGNGG	GgAaTAcAGTGTCTATTTCcAGG	4	59513936	+	4
GCACTAGAGTGTCTATTTCGNGG	GCAagAGAaTGTgTATTTCGAGG	4	62968142	-	4	Psd3	ENSRNOG00000013884	+	overlapping	0	782.035	-0.5692	0.0272675
GCACTAGAGTGTCTATTTCGNGG	GCtCaAGAGTGTtTATTTCaTGG	4	145630245	+	4
GCACTAGAGTGTCTATTTCGNGG	GCACcgGAGTGTCTATTTatAGG	5	4473804	-	4	Ets1	ENSRNOG00000008941	+	downstream	1126	465.42	-0.603484	0.00911466
GCACTAGAGTGTCTATTTCGNGG	GCACaAGAtTtTCTATTTtGCGG	5	46176328	-	4
GCACTAGAGTGTCTATTTCGNGG	GCtCTAGAcTGTCTcTTTCcTGG	5	143665547	-	4
GCACTAGAGTGTCTATTTCGNGG	GaACTAGAGTGTCcATgTaGGGG	5	159579998	-	4	Kcnip1	ENSRNOG00000005365	-	overlapping	0	1042.63	1.13602	1.17587e-12
GCACTAGAGTGTCTATTTCGNGG	tCACTActGTcTCTATTTCGGGG	6	43860869	-	4	Man1a1	ENSRNOG00000000800	-	overlapping	0	158.17	-0.00130652	0.997583
GCACTAGAGTGTCTATTTCGNGG	tCAgTAGAGTGTCTATgTCtAGG	6	54097842	-	4
GCACTAGAGTGTCTATTTCGNGG	tCAgTAGAGTGTCTATTgCtAGG	7	66461453	-	4
GCACTAGAGTGTCTATTTCGNGG	cCACTctAGTGTgTATTTCGTGG	7	117936923	-	4	Sgcd	ENSRNOG00000002372	-	overlapping	0	35.8917	-0.312972	0.685567
GCACTAGAGTGTCTATTTCGNGG	GCAtcAGAGgGTCcATTTCGGGG	7	133722366	-	4
GCACTAGAGTGTCTATTTCGNGG	tCcCTAGAGTtTCTATTTCcAGG	8	24925107	+	4
GCACTAGAGTGTCTATTTCGNGG	GCAaTAGAGTGTCaATcTCtGGG	8	33815260	-	4
GCACTAGAGTGTCTATTTCGNGG	GCACTAcAGTGTagATTTaGTGG	9	11490414	-	4
GCACTAGAGTGTCTATTTCGNGG	aCACgAGAGTGTCTgTTTCcTGG	9	53785044	+	4	Irak2	ENSRNOG00000021817	+	overlapping	0	240.067	-0.175692	0.54877
GCACTAGAGTGTCTATTTCGNGG	GCACTAGAGTaTCaATTcCGTGG	10	18742372	+	3	Eya1	ENSRNOG00000007590	+	overlapping	0	251.502	0.0814068	0.862508
GCACTAGAGTGTCTATTTCGNGG	tCACTAGAGTGTCTtTTaCaGGG	10	22760734	+	4
GCACTAGAGTGTCTATTTCGNGG	GCACTAGAaaGaCTATTTCaAGG	10	32393446	-	4	Grik3	ENSRNOG00000008992	+	overlapping	0	911.453	0.384673	0.183455
GCACTAGAGTGTCTATTTCGNGG	aCACTAGAGaGTCaATTcCGAGG	10	77183853	-	4	Crocc	ENSRNOG00000008334	-	overlapping	0	810.524	-0.681468	0.000420442
GCACTAGAGTGTCTATTTCGNGG	GCACTAGtaTGTaTgTTTCGGGG	10	100043788	+	4	Cys1	ENSRNOG00000058891	-	overlapping	0	179.469	0.369623	0.295346
GCACTAGAGTGTCTATTTCGNGG	caAgTAGAGTGTCTATTTtGTGG	11	14587247	-	4	Zfp251	ENSRNOG00000030308	-	overlapping	0	1666.27	-0.180323	0.282009
GCACTAGAGTGTCTATTTCGNGG	aCACTAGAcaGTCTATTTaGGGG	11	18905453	-	4
GCACTAGAGTGTCTATTTCGNGG	GCACgAGAaTGTCTtaTTCGGGG	11	65813661	-	4
GCACTAGAGTGTCTATTTCGNGG	tCACTAGAtgtTCTATTTCGGGG	12	34330387	-	4
GCACTAGAGTGTCTATTTCGNGG	GCACTtGAGTGgCTATTTtGGGG	13	36778117	-	3	Lnx1	ENSRNOG00000002272	+	overlapping	0	1341.66	0.0328038	0.882631
GCACTAGAGTGTCTATTTCGNGG	GCACTtGAGTGgCTATTTtGGGG	13	36778320	-	3
GCACTAGAGTGTCTATTTCGNGG	GCACTtGAGTGgCTATTTtGGGG	13	36778378	-	3
GCACTAGAGTGTCTATTTCGNGG	GtACTtGAGTGgCTATTTtGGGG	13	36778436	-	4
GCACTAGAGTGTCTATTTCGNGG	GCACTtGAGTGTgTtTTTCtGGG	14	19910517	+	4
GCACTAGAGTGTCTATTTCGNGG	GtACTAGtGTaTCTATTTCcTGG	14	34347562	+	4	Chn1	ENSRNOG00000017939	-	overlapping	0	3725.46	0.594021	0.000392611
GCACTAGAGTGTCTATTTCGNGG	GCcCTgGAGTGTCTATgTaGGGG	14	36070548	-	4	Hoxd3	ENSRNOG00000001577	+	overlapping	0	0	NA	NA
GCACTAGAGTGTCTATTTCGNGG	aCAtagGAGTGTCTATTTCGAGG	14	36832891	-	4
GCACTAGAGTGTCTATTTCGNGG	tCACTAGAGTGTCcAcTTCcCGG	14	92598872	+	4	Slc1a2	ENSRNOG00000005479	+	overlapping	0	1397.89	0.569096	0.478182
GCACTAGAGTGTCTATTTCGNGG	aCACTAGAGTGTCTAaTTtaGGG	14	93241502	+	4
GCACTAGAGTGTCTATTTCGNGG	aCACTAGAGTaaCTATTTgGGGG	14	93566688	-	4	Secisbp2l	ENSRNOG00000008629	-	overlapping	0	5556.25	-0.166027	0.409163
GCACTAGAGTGTCTATTTCGNGG	cCACTAGAcTGTCTATcTCtTGG	16	23528717	-	4	Bcl2l11	ENSRNOG00000016551	+	overlapping	0	337.041	-0.153403	0.576052
GCACTAGAGTGTCTATTTCGNGG	GCACTgGAcTGTCTATTTCGAGG	16	45165136	-	2
GCACTAGAGTGTCTATTTCGNGG	GCACagGAGTGTgTATgTCGGGG	16	68737906	+	4	Plxna4	ENSRNOG00000013072	-	overlapping	0	950.271	0.223772	0.786134
GCACTAGAGTGTCTATTTCGNGG	aCACcAGAGTtTCTATTTCcTGG	17	11268352	+	4	Adamts3	ENSRNOG00000027463	+	overlapping	0	302.416	0.0445767	0.923258
GCACTAGAGTGTCTATTTCGNGG	GCACTAGAGTcTggATTTCtGGG	17	37311895	+	4
GCACTAGAGTGTCTATTTCGNGG	GCACTAcAGTGTaTATgTgGAGG	18	16216418	+	4
GCACTAGAGTGTCTATTTCGNGG	GCACTAGAGaGTaTcTTTCcAGG	18	41172923	+	4
GCACTAGAGTGTCTATTTCGNGG	GCACTAGtGTGTCaATgTCcAGG	18	61601229	+	4
GCACTAGAGTGTCTATTTCGNGG	GCACTgGAGTGTCTgTgTCGGGG	19	54954178	-	3	Csnk2b	ENSRNOG00000000847	-	overlapping	0	3153.14	0.0545584	0.806642
GCACTAGAGTGTCTATTTCGNGG	GCACTtGAcTGTCTAaaTCGTGG	20	5109560	-	4
GCACTAGAGTGTCTATTTCGNGG	aCACTAGAGTGTtTtTTTaGTGG	20	35337609	+	4
GCACTAGAGTGTCTATTTCGNGG	GCtCTAGAGTGTCTAgTTaGTGG	X	133870812	+	3
